# Supplementary material for: Effectiveness of electrophysical modalities in the sensorimotor rehabilitation of radial, ulnar, and median neuropathies: A meta-analysis
Source: PubMed Central journal article supplement (PMC7971482; doi:10.1371/journal.pone.0248484), 2021-03-18
Supplement: pone.0248484.s003.pdf [file pone.0248484.s003.pdf]

# Electrophysical compared to placebo

**Author(s):** Bula Oyola, Ena Lucía; Belda Lois, Juan Manuel; Porcar Seder, Rosa; Page Del Pozo, Álvaro

**Question:** Electrophysical therapy modalities compared to placebo for radial, ulnar or median neuropathies

**Setting:**

**Bibliography:**

| Certainty assessment |              |              |               |              |             |                      | № of patients                      |         | Effect            |                   | Certainty | Importance |
|----------------------|--------------|--------------|---------------|--------------|-------------|----------------------|------------------------------------|---------|-------------------|-------------------|-----------|------------|
| № of studies         | Study design | Risk of bias | Inconsistency | Indirectness | Imprecision | Other considerations | electrophysical therapy modalities | placebo | Relative (95% CI) | Absolute (95% CI) |           |            |

**Pain (VAS) (follow up: range 2 weeks to 18; assessed with: Visual analog scale; Scale from: 0 to 10)**

|    |                   |                      |                      |             |             |                                                  |     |     |   |                                                         |                  |           |
|----|-------------------|----------------------|----------------------|-------------|-------------|--------------------------------------------------|-----|-----|---|---------------------------------------------------------|------------------|-----------|
| 12 | randomised trials | serious <sup>a</sup> | serious <sup>b</sup> | not serious | not serious | publication bias strongly suspected <sup>c</sup> | 352 | 348 | - | SMD <b>0.89 SD lower</b><br>(1.79 lower to 0.02 higher) | ⊕○○○<br>VERY LOW | IMPORTANT |
|----|-------------------|----------------------|----------------------|-------------|-------------|--------------------------------------------------|-----|-----|---|---------------------------------------------------------|------------------|-----------|

**Symptom Severity (follow up: range 2 weeks to 18 weeks; assessed with: Symptom Severity Scale; Scale from: 1 to 5)**

|    |                   |                      |                      |             |             |                                                  |     |     |   |                                                        |                  |           |
|----|-------------------|----------------------|----------------------|-------------|-------------|--------------------------------------------------|-----|-----|---|--------------------------------------------------------|------------------|-----------|
| 11 | randomised trials | serious <sup>a</sup> | serious <sup>b</sup> | not serious | not serious | publication bias strongly suspected <sup>c</sup> | 374 | 373 | - | SMD <b>1.01 SD lower</b><br>(1.65 lower to 0.37 lower) | ⊕○○○<br>VERY LOW | IMPORTANT |
|----|-------------------|----------------------|----------------------|-------------|-------------|--------------------------------------------------|-----|-----|---|--------------------------------------------------------|------------------|-----------|

**Functional Status (follow up: range 2 weeks to 18 weeks; assessed with: Functional Status Scale; Scale from: 1 to 5)**

|    |                   |                      |                      |             |             |                                                  |     |     |   |                                                        |                  |           |
|----|-------------------|----------------------|----------------------|-------------|-------------|--------------------------------------------------|-----|-----|---|--------------------------------------------------------|------------------|-----------|
| 10 | randomised trials | serious <sup>a</sup> | serious <sup>b</sup> | not serious | not serious | publication bias strongly suspected <sup>c</sup> | 320 | 319 | - | SMD <b>0.79 SD lower</b><br>(1.45 lower to 0.13 lower) | ⊕○○○<br>VERY LOW | IMPORTANT |
|----|-------------------|----------------------|----------------------|-------------|-------------|--------------------------------------------------|-----|-----|---|--------------------------------------------------------|------------------|-----------|

**Motor Latency (follow up: range 2 weeks to 18 weeks)**

|    |                   |                      |                      |             |             |                                                  |     |     |   |                                                         |                  |           |
|----|-------------------|----------------------|----------------------|-------------|-------------|--------------------------------------------------|-----|-----|---|---------------------------------------------------------|------------------|-----------|
| 14 | randomised trials | serious <sup>d</sup> | serious <sup>b</sup> | not serious | not serious | publication bias strongly suspected <sup>c</sup> | 458 | 454 | - | SMD <b>0.31 SD lower</b><br>(0.66 lower to 0.04 higher) | ⊕○○○<br>VERY LOW | IMPORTANT |
|----|-------------------|----------------------|----------------------|-------------|-------------|--------------------------------------------------|-----|-----|---|---------------------------------------------------------|------------------|-----------|

**Sensory Latency (follow up: range 2 weeks to 18 weeks)**

|    |                   |                      |                      |             |             |                                                  |     |     |   |                                                          |                  |           |
|----|-------------------|----------------------|----------------------|-------------|-------------|--------------------------------------------------|-----|-----|---|----------------------------------------------------------|------------------|-----------|
| 11 | randomised trials | serious <sup>d</sup> | serious <sup>b</sup> | not serious | not serious | publication bias strongly suspected <sup>c</sup> | 358 | 355 | - | SMD <b>0.03 SD higher</b><br>(0.29 lower to 0.35 higher) | ⊕○○○<br>VERY LOW | IMPORTANT |
|----|-------------------|----------------------|----------------------|-------------|-------------|--------------------------------------------------|-----|-----|---|----------------------------------------------------------|------------------|-----------|

**Motor Nerve Conduction Velocity (follow up: range 2 weeks to 18 weeks)**

| Certainty assessment                                                              |                   |                      |                      |              |             |                                                  | № of patients                      |         | Effect            |                                                   | Certainty        | Importance |
|-----------------------------------------------------------------------------------|-------------------|----------------------|----------------------|--------------|-------------|--------------------------------------------------|------------------------------------|---------|-------------------|---------------------------------------------------|------------------|------------|
| № of studies                                                                      | Study design      | Risk of bias         | Inconsistency        | Indirectness | Imprecision | Other considerations                             | electrophysical therapy modalities | placebo | Relative (95% CI) | Absolute (95% CI)                                 |                  |            |
| 6                                                                                 | randomised trials | serious <sup>d</sup> | serious <sup>b</sup> | not serious  | not serious | none                                             | 177                                | 177     | -                 | SMD 0.27 SD higher<br>(0.25 lower to 0.8 higher)  | ⊕⊕○○<br>LOW      | IMPORTANT  |
| Sensory Nerve Conduction Velocity (follow up: range 2 weeks to 18 weeks)          |                   |                      |                      |              |             |                                                  |                                    |         |                   |                                                   |                  |            |
| 12                                                                                | randomised trials | serious <sup>a</sup> | serious <sup>b</sup> | not serious  | not serious | publication bias strongly suspected <sup>c</sup> | 360                                | 359     | -                 | SMD 0.09 SD lower<br>(0.57 lower to 0.38 higher)  | ⊕○○○<br>VERY LOW | IMPORTANT  |
| Compound Muscle Action Potential Amplitude (follow up: range 2 weeks to 18 weeks) |                   |                      |                      |              |             |                                                  |                                    |         |                   |                                                   |                  |            |
| 5                                                                                 | randomised trials | serious <sup>d</sup> | serious <sup>b</sup> | not serious  | not serious | none                                             | 186                                | 185     | -                 | SMD 0.15 SD higher<br>(0.41 lower to 0.72 higher) | ⊕⊕○○<br>LOW      | IMPORTANT  |
| Sensory Nerve Action Potential Amplitude (follow up: range 2 weeks to 18 weeks)   |                   |                      |                      |              |             |                                                  |                                    |         |                   |                                                   |                  |            |
| 4                                                                                 | randomised trials | serious <sup>d</sup> | serious <sup>b</sup> | not serious  | not serious | none                                             | 167                                | 166     | -                 | SMD 0.28 SD higher<br>(0.06 lower to 0.62 higher) | ⊕⊕○○<br>LOW      | IMPORTANT  |
| Grip Strength (follow up: range 2 weeks to 18 weeks; assessed with: Dynamometry)  |                   |                      |                      |              |             |                                                  |                                    |         |                   |                                                   |                  |            |
| 6                                                                                 | randomised trials | serious <sup>a</sup> | serious <sup>b</sup> | not serious  | not serious | none                                             | 228                                | 226     | -                 | SMD 0.08 SD higher<br>(0.22 lower to 0.37 higher) | ⊕⊕○○<br>LOW      | IMPORTANT  |
| Pinch Strength (follow up: range 2 weeks to 18 weeks; assessed with: Dynamometry) |                   |                      |                      |              |             |                                                  |                                    |         |                   |                                                   |                  |            |
| 3                                                                                 | randomised trials | serious <sup>a</sup> | serious <sup>b</sup> | not serious  | not serious | none                                             | 114                                | 113     | -                 | SMD 0.57 SD higher<br>(0.26 lower to 1.41 higher) | ⊕⊕○○<br>LOW      | IMPORTANT  |

CI: Confidence interval; SMD: Standardised mean difference

## Explanations

a. Risk of bias in blinding of participants, personnel and assessors and incomplete information about dropouts.

b. Heterogeneity >50%.

c. Risk of publication bias identified by funnel plot.

d. Risk of bias in random sequence generation, allocation concealment, and blinding of participants, personnel and assessors.

# Electrophysical compared to manual therapy

**Author(s):** Bula Oyola, Ena Lucia; Belda Lois, Juan Manuel; Porcar Seder, Rosa; Page Del Pozo, Álvaro

**Question:** Electrophysical therapy modalities compared to manual therapy for radial, ulnar or median neuropathies

**Setting:**

**Bibliography:**

| Certainty assessment                                                                                                        |                   |                      |                      |              |             |                      | № of patients                      |                | Effect            |                                                   | Certainty   | Importance |
|-----------------------------------------------------------------------------------------------------------------------------|-------------------|----------------------|----------------------|--------------|-------------|----------------------|------------------------------------|----------------|-------------------|---------------------------------------------------|-------------|------------|
| № of studies                                                                                                                | Study design      | Risk of bias         | Inconsistency        | Indirectness | Imprecision | Other considerations | electrophysical therapy modalities | manual therapy | Relative (95% CI) | Absolute (95% CI)                                 |             |            |
| <b>Pain (VAS) (follow up: range 2 weeks to 18 weeks; assessed with: Visual analog scale; Scale from: 0 to 10)</b>           |                   |                      |                      |              |             |                      |                                    |                |                   |                                                   |             |            |
| 3                                                                                                                           | randomised trials | serious <sup>a</sup> | serious <sup>b</sup> | not serious  | not serious | none                 | 62                                 | 62             | -                 | SMD 0.19 SD higher<br>(2.39 lower to 2.77 higher) | ⊕⊕○○<br>LOW | IMPORTANT  |
| <b>Symptom Severity (follow up: range 2 weeks to 18 weeks; assessed with: Symptom Severity Scale; Scale from: 1 to 5)</b>   |                   |                      |                      |              |             |                      |                                    |                |                   |                                                   |             |            |
| 3                                                                                                                           | randomised trials | serious <sup>a</sup> | serious <sup>b</sup> | not serious  | not serious | none                 | 117                                | 117            | -                 | SMD 1.44 SD higher<br>(0.27 lower to 3.15 higher) | ⊕⊕○○<br>LOW | IMPORTANT  |
| <b>Functional Status (follow up: range 2 weeks to 18 weeks; assessed with: Functional Status Scale; Scale from: 1 to 5)</b> |                   |                      |                      |              |             |                      |                                    |                |                   |                                                   |             |            |
| 3                                                                                                                           | randomised trials | serious <sup>a</sup> | serious <sup>b</sup> | not serious  | not serious | none                 | 117                                | 117            | -                 | SMD 0.99 SD higher<br>(0.1 higher to 1.89 higher) | ⊕⊕○○<br>LOW | IMPORTANT  |
| <b>Motor Latency (follow up: range 2 weeks to 18 weeks)</b>                                                                 |                   |                      |                      |              |             |                      |                                    |                |                   |                                                   |             |            |
| 3                                                                                                                           | randomised trials | serious <sup>c</sup> | serious <sup>b</sup> | not serious  | not serious | none                 | 97                                 | 97             | -                 | SMD 0.47 SD lower<br>(1.51 lower to 0.56 higher)  | ⊕⊕○○<br>LOW | IMPORTANT  |
| <b>Sensory Latency (follow up: range 2 weeks to 18 weeks)</b>                                                               |                   |                      |                      |              |             |                      |                                    |                |                   |                                                   |             |            |
| 2                                                                                                                           | randomised trials | serious <sup>c</sup> | serious <sup>b</sup> | not serious  | not serious | none                 | 27                                 | 27             | -                 | SMD 0.48 SD lower<br>(1.74 lower to 0.78 higher)  | ⊕⊕○○<br>LOW | IMPORTANT  |

**Sensory Nerve Conduction Velocity (follow up: range 2 weeks to 18 weeks)**

| Certainty assessment |                   |                      |                      |              |             |                      | № of patients                      |                | Effect            |                                                  | Certainty   | Importance |
|----------------------|-------------------|----------------------|----------------------|--------------|-------------|----------------------|------------------------------------|----------------|-------------------|--------------------------------------------------|-------------|------------|
| № of studies         | Study design      | Risk of bias         | Inconsistency        | Indirectness | Imprecision | Other considerations | electrophysical therapy modalities | manual therapy | Relative (95% CI) | Absolute (95% CI)                                |             |            |
| 2                    | randomised trials | serious <sup>d</sup> | serious <sup>b</sup> | not serious  | not serious | none                 | 85                                 | 85             | -                 | SMD 0.61 SD higher<br>(0.07 lower to 1.3 higher) | ⊕⊕○○<br>LOW | IMPORTANT  |

Grip Strength (follow up: range 2 weeks to 18 weeks; assessed with: Dynamometry)

|   |                   |                      |                      |             |             |      |    |    |   |                                                  |             |           |
|---|-------------------|----------------------|----------------------|-------------|-------------|------|----|----|---|--------------------------------------------------|-------------|-----------|
| 2 | randomised trials | serious <sup>d</sup> | serious <sup>b</sup> | not serious | not serious | none | 27 | 27 | - | SMD 0.89 SD lower<br>(2.49 lower to 0.71 higher) | ⊕⊕○○<br>LOW | IMPORTANT |
|---|-------------------|----------------------|----------------------|-------------|-------------|------|----|----|---|--------------------------------------------------|-------------|-----------|

CI: Confidence interval; SMD: Standardised mean difference

## Explanations

a. Risk of bias in random sequence generation, allocation concealment, incomplete information on drop-outs, and blinding of participants, personnel and assessors.  
b. Heterogeneity >50%.

c. Risk of bias in allocation concealment and blinding of participants, personnel and assessors.  
d. Risk of bias in blinding of participants, personnel and assessors and incomplete information on drop-outs.

# Electrophysical compared to splinting

**Author(s):** Bula Oyola, Ena Lucia; Belda Lois, Juan Manuel; Porcar Seder, Rosa; Page Del Pozo, Álvaro  
**Question:** Electrophysical therapy modalities compared to splinting for radial, ulnar or median neuropathies  
**Setting:**  
**Bibliography:**

| Certainty assessment |              |              |               |              |             |                      | № of patients                      |           | Effect            |                   | Certainty | Importance |
|----------------------|--------------|--------------|---------------|--------------|-------------|----------------------|------------------------------------|-----------|-------------------|-------------------|-----------|------------|
| № of studies         | Study design | Risk of bias | Inconsistency | Indirectness | Imprecision | Other considerations | electrophysical therapy modalities | splinting | Relative (95% CI) | Absolute (95% CI) |           |            |

**Pain (VAS) (follow up: range 2 weeks to 18 weeks; assessed with: Visual analog scale; Scale from: 0 to 10)**

|   |                   |                        |                      |             |             |      |    |    |   |                                                  |             |           |
|---|-------------------|------------------------|----------------------|-------------|-------------|------|----|----|---|--------------------------------------------------|-------------|-----------|
| 4 | randomised trials | serious <sup>a,b</sup> | serious <sup>c</sup> | not serious | not serious | none | 83 | 78 | - | SMD 0.77 SD lower<br>(1.59 lower to 0.05 higher) | ⊕⊕○○<br>LOW | IMPORTANT |
|---|-------------------|------------------------|----------------------|-------------|-------------|------|----|----|---|--------------------------------------------------|-------------|-----------|

**Symptom Severity (follow up: range 2 weeks to 18 weeks; assessed with: Symptom Severity Scale; Scale from: 1 to 5)**

|   |                   |                        |                      |             |             |      |    |    |   |                                                  |             |           |
|---|-------------------|------------------------|----------------------|-------------|-------------|------|----|----|---|--------------------------------------------------|-------------|-----------|
| 3 | randomised trials | serious <sup>a,b</sup> | serious <sup>c</sup> | not serious | not serious | none | 57 | 55 | - | SMD 0.66 SD lower<br>(1.33 lower to 0.01 higher) | ⊕⊕○○<br>LOW | IMPORTANT |
|---|-------------------|------------------------|----------------------|-------------|-------------|------|----|----|---|--------------------------------------------------|-------------|-----------|

**Functional Status (follow up: range 2 weeks to 18 weeks; assessed with: Functional Status Scale; Scale from: 1 to 5)**

|   |                   |                        |                      |             |             |      |    |    |   |                                                 |             |           |
|---|-------------------|------------------------|----------------------|-------------|-------------|------|----|----|---|-------------------------------------------------|-------------|-----------|
| 3 | randomised trials | serious <sup>b,d</sup> | serious <sup>c</sup> | not serious | not serious | none | 57 | 55 | - | SMD 0.55 SD lower<br>(1.2 lower to 0.11 higher) | ⊕⊕○○<br>LOW | IMPORTANT |
|---|-------------------|------------------------|----------------------|-------------|-------------|------|----|----|---|-------------------------------------------------|-------------|-----------|

**Motor Latency (follow up: range 2 weeks to 18 weeks)**

|   |                   |                        |                      |             |             |      |    |    |   |                                                 |             |           |
|---|-------------------|------------------------|----------------------|-------------|-------------|------|----|----|---|-------------------------------------------------|-------------|-----------|
| 2 | randomised trials | serious <sup>b,d</sup> | serious <sup>c</sup> | not serious | not serious | none | 39 | 41 | - | SMD 0.31 SD lower<br>(1.5 lower to 0.88 higher) | ⊕⊕○○<br>LOW | IMPORTANT |
|---|-------------------|------------------------|----------------------|-------------|-------------|------|----|----|---|-------------------------------------------------|-------------|-----------|

**Sensory Nerve Conduction Velocity (follow up: range 2 weeks to 18 weeks)**

|   |                   |                        |                      |             |             |      |    |    |   |                                                   |             |           |
|---|-------------------|------------------------|----------------------|-------------|-------------|------|----|----|---|---------------------------------------------------|-------------|-----------|
| 3 | randomised trials | serious <sup>b,d</sup> | serious <sup>c</sup> | not serious | not serious | none | 57 | 59 | - | SMD 0.53 SD higher<br>(0.42 lower to 1.48 higher) | ⊕⊕○○<br>LOW | IMPORTANT |
|---|-------------------|------------------------|----------------------|-------------|-------------|------|----|----|---|---------------------------------------------------|-------------|-----------|

CI: Confidence interval; SMD: Standardised mean difference

## Explanations

a. Risk of bias in random sequence generation, incomplete information on drop-outs, incomplete outcome data (intention to include in analysis) and selective reporting.  
 b. Since the comparator was a splint, concealment and blinding were not feasible. These risks were ruled out.

c. Heterogeneity >50%.  
 d. Risk of bias by incomplete information on drop-outs, incomplete outcome data (intention to include in analysis) and selective reporting.

## Low-level laser therapy compared to other electrophysical modalities

**Author(s):** Bula Oyola, Ena Lucía; Belda Lois, Juan Manuel; Porcar Seder, Rosa; Page Del Pozo, Álvaro

**Question:** Low-level laser therapy compared to other electrophysical modalities for radial, ulnar or median neuropathies

**Setting:**

**Bibliography:**

| Certainty assessment |              |              |               |              |             |                      | № of patients           |                                  | Effect            |                   | Certainty | Importance |
|----------------------|--------------|--------------|---------------|--------------|-------------|----------------------|-------------------------|----------------------------------|-------------------|-------------------|-----------|------------|
| № of studies         | Study design | Risk of bias | Inconsistency | Indirectness | Imprecision | Other considerations | low-level laser therapy | other electrophysical modalities | Relative (95% CI) | Absolute (95% CI) |           |            |

**Pain (VAS) (follow up: range 2 weeks to 18 weeks; assessed with: Visual analog scale; Scale from: 0 to 10)**

|   |                   |                      |                      |             |             |      |    |    |   |                                                   |             |           |
|---|-------------------|----------------------|----------------------|-------------|-------------|------|----|----|---|---------------------------------------------------|-------------|-----------|
| 3 | randomised trials | serious <sup>a</sup> | serious <sup>b</sup> | not serious | not serious | none | 85 | 85 | - | SMD 1.11 SD higher<br>(0.52 lower to 2.75 higher) | ⊕⊕○○<br>LOW | IMPORTANT |
|---|-------------------|----------------------|----------------------|-------------|-------------|------|----|----|---|---------------------------------------------------|-------------|-----------|

**Motor Latency (follow up: range 2 weeks to 18 weeks)**

|   |                   |                      |                      |             |             |      |     |     |   |                                                  |             |           |
|---|-------------------|----------------------|----------------------|-------------|-------------|------|-----|-----|---|--------------------------------------------------|-------------|-----------|
| 4 | randomised trials | serious <sup>c</sup> | serious <sup>b</sup> | not serious | not serious | none | 103 | 100 | - | SMD 1.42 SD higher<br>(1.3 lower to 4.14 higher) | ⊕⊕○○<br>LOW | IMPORTANT |
|---|-------------------|----------------------|----------------------|-------------|-------------|------|-----|-----|---|--------------------------------------------------|-------------|-----------|

**Sensory Nerve Conduction Velocity (follow up: range 2 weeks to 18 weeks)**

|   |                   |                      |             |             |             |      |    |    |   |                                                    |                  |           |
|---|-------------------|----------------------|-------------|-------------|-------------|------|----|----|---|----------------------------------------------------|------------------|-----------|
| 2 | randomised trials | serious <sup>c</sup> | not serious | not serious | not serious | none | 28 | 25 | - | SMD 0.56 SD higher<br>(0.01 higher to 1.12 higher) | ⊕⊕⊕○<br>MODERATE | IMPORTANT |
|---|-------------------|----------------------|-------------|-------------|-------------|------|----|----|---|----------------------------------------------------|------------------|-----------|

CI: Confidence interval; SMD: Standardised mean difference

### Explanations

a. Risk of bias in allocation concealment, selective reporting, and blinding of participants and personnel.

b. Heterogeneity >50%.

c. Risk of bias in random sequence generation, allocation concealment, incomplete information on drop-outs, selective reporting, and blinding of participants and personnel.

# Ultrasound therapy compared to other electrophysical modalities

**Author(s):** Bula Oyola, Ena Lucia; Belda Lois, Juan Manuel; Porcar Seder, Rosa; Page Del Pozo, Álvaro

**Question:** Ultrasound therapy compared to other electrophysical modalities for radial, ulnar or median neuropathies

**Setting:**

**Bibliography:**

| Certainty assessment |              |              |               |              |             |                      | Nº of patients     |                                  | Effect            |                   | Certainty | Importance |
|----------------------|--------------|--------------|---------------|--------------|-------------|----------------------|--------------------|----------------------------------|-------------------|-------------------|-----------|------------|
| Nº of studies        | Study design | Risk of bias | Inconsistency | Indirectness | Imprecision | Other considerations | ultrasound therapy | other electrophysical modalities | Relative (95% CI) | Absolute (95% CI) |           |            |

**Symptom Severity (follow up: range 2 weeks to 18 weeks; assessed with: Symptom Severity Scale; Scale from: 1 to 5)**

|   |                   |                      |                      |             |             |      |    |    |   |                                                  |             |           |
|---|-------------------|----------------------|----------------------|-------------|-------------|------|----|----|---|--------------------------------------------------|-------------|-----------|
| 3 | randomised trials | serious <sup>a</sup> | serious <sup>b</sup> | not serious | not serious | none | 82 | 84 | - | SMD 0.11 SD lower<br>(1.05 lower to 0.83 higher) | ⊕⊕○○<br>LOW | IMPORTANT |
|---|-------------------|----------------------|----------------------|-------------|-------------|------|----|----|---|--------------------------------------------------|-------------|-----------|

**Functional Status (follow up: range 2 weeks to 18 weeks; assessed with: Functional Status Scale; Scale from: 1 to 5)**

|   |                   |                      |                          |             |             |      |    |    |   |                                                  |                  |           |
|---|-------------------|----------------------|--------------------------|-------------|-------------|------|----|----|---|--------------------------------------------------|------------------|-----------|
| 3 | randomised trials | serious <sup>a</sup> | not serious <sup>b</sup> | not serious | not serious | none | 82 | 84 | - | SMD 0.04 SD lower<br>(0.34 lower to 0.27 higher) | ⊕⊕⊕○<br>MODERATE | IMPORTANT |
|---|-------------------|----------------------|--------------------------|-------------|-------------|------|----|----|---|--------------------------------------------------|------------------|-----------|

CI: Confidence interval; SMD: Standardised mean difference

## Explanations

- a. Risk of bias in random sequence generation, allocation concealment, incomplete information on drop-outs, selective reporting, and blinding of participants and personnel.  
b. Heterogeneity >50%.

# Low-level laser therapy compared to Ultrasound therapy

**Author(s):** Bula Oyola, Ena Lucia; Belda Lois, Juan Manuel; Porcar Seder, Rosa; Page Del Pozo, Álvaro

**Question:** Low-level laser therapy compared to ultrasound therapy for radial, ulnar or median neuropathy

**Setting:**

**Bibliography:**

| Certainty assessment |              |              |               |              |             |                      | № of patients           |                    | Effect            |                   | Certainty | Importance |
|----------------------|--------------|--------------|---------------|--------------|-------------|----------------------|-------------------------|--------------------|-------------------|-------------------|-----------|------------|
| № of studies         | Study design | Risk of bias | Inconsistency | Indirectness | Imprecision | Other considerations | low-level laser therapy | ultrasound therapy | Relative (95% CI) | Absolute (95% CI) |           |            |

**Sensory Latency (follow up: range 2 weeks to 18 weeks)**

|   |                   |                      |                      |             |             |      |    |    |   |                                                  |             |           |
|---|-------------------|----------------------|----------------------|-------------|-------------|------|----|----|---|--------------------------------------------------|-------------|-----------|
| 2 | randomised trials | serious <sup>a</sup> | serious <sup>b</sup> | not serious | not serious | none | 75 | 75 | - | SMD 1.65 SD lower<br>(3.66 lower to 0.36 higher) | ⊕⊕○○<br>LOW | IMPORTANT |
|---|-------------------|----------------------|----------------------|-------------|-------------|------|----|----|---|--------------------------------------------------|-------------|-----------|

**Grip Strength (follow up: range 2 weeks to 18 weeks; assessed with: Dynamometry)**

|   |                   |                      |                      |             |             |      |    |    |   |                                                 |             |           |
|---|-------------------|----------------------|----------------------|-------------|-------------|------|----|----|---|-------------------------------------------------|-------------|-----------|
| 2 | randomised trials | serious <sup>c</sup> | serious <sup>b</sup> | not serious | not serious | none | 39 | 40 | - | SMD 1.25 SD lower<br>(2.23 lower to 0.27 lower) | ⊕⊕○○<br>LOW | IMPORTANT |
|---|-------------------|----------------------|----------------------|-------------|-------------|------|----|----|---|-------------------------------------------------|-------------|-----------|

**CI:** Confidence interval; **SMD:** Standardised mean difference

## Explanations

a. Risk of bias in blinding of participants and personnel, and selective reporting.

b. Heterogeneity >50%.

c. Risk of bias in allocation concealment, blinding of participants and personnel, and incomplete information on drop-outs.
